# Supplementary material for: Gochujang Ameliorates Hepatic Inflammation by Improving Dysbiosis of Gut Microbiota in High-Fat Diet-Induced Obese Mice
Source: MDPI journal article supplement (doi:10.3390/microorganisms11040911), 2023-03-31
Supplement: s1 [file s1]

**Table S1.** *Gochujang* compositions

|                       | HBM    | DBM    |
|-----------------------|--------|--------|
| Carbohydrate (g/100g) | 41.52  | 39.02  |
| Protein (g/100g)      | 5.62   | 5.86   |
| Fat (g/100g)          | 2.83   | 3.01   |
| NaCl (g/100g)         | 6.6    | 6.8    |
| Calorie (kcal/100g)   | 214.03 | 206.61 |

**Table S2.** Diet compositions

|                         | ND      | HD     | SALT   | HBM    | DBM    |
|-------------------------|---------|--------|--------|--------|--------|
| Casein (g)              | 200     | 200    | 200    | 195.7  | 195.5  |
| L-Cystine (g)           | 3       | 3      | 3      | 3      | 3      |
| Corn starch (g)         | 506.2   | 0      | 0      | 0      | 0      |
| Maltodextrin 10 (g)     | 125     | 125    | 125    | 93     | 94.9   |
| Sucrose (g)             | 72.8    | 72.8   | 72.8   | 72.8   | 72.8   |
| Cellulose (g)           | 50      | 50     | 50     | 50     | 50     |
| Soybean oil (g)         | 25      | 25     | 25     | 25     | 25     |
| Lard (g)                | 20      | 245    | 245    | 242.8  | 242.7  |
| Mineral mix (g)         | 10      | 10     | 10     | 10     | 10     |
| Vitamin (g)             | 10      | 10     | 10     | 10     | 10     |
| Choline bitartrate (g)  | 2       | 2      | 2      | 2      | 2      |
| Dicalcium phosphate (g) | 13      | 13     | 13     | 13     | 13     |
| Calcium carbonate (g)   | 5.5     | 5.5    | 5.5    | 5.5    | 5.5    |
| Potassium citrate (g)   | 16.5    | 16.5   | 16.5   | 16.5   | 16.5   |
| Gochujang (g)           |         |        |        | 77.00  | 77.00  |
| NaCl (g)                |         |        | 5.4    |        |        |
| Total (g)               | 1059.00 | 777.80 | 783.23 | 816.32 | 817.92 |

**Table S3.** Primer list for PCR

| Gene Name      | Primers | Sequence (5'→3')            |
|----------------|---------|-----------------------------|
| IL-1 $\beta$   | Forward | CACCTTCTTTTCCTTCATCTTTG     |
|                | Reverse | GTCGTTGCTTGTCTCTCCTTGTA     |
| TNF- $\alpha$  | Forward | ACTGAACTTCGGGGTGATTG        |
|                | Reverse | GCTTGGTGGTTTGCTACGAC        |
| NF- $\kappa$ B | Forward | GAATTCAGTCACTGGCCTCC        |
|                | Reverse | TTCAAGACAAAGGAGGTCTGTTT     |
| COX-2          | Forward | ACCCCCTGCTGCCCGACACCT       |
|                | Reverse | CCAGCAACCCGGCCAGCAATC       |
| $\beta$ -actin | Forward | AGC CTT CCT TCT TGG GTA TGG |
|                | Reverse | CAC TTG CGG TGC ACG ATG GAG |

IL, interleukin; TNF- $\alpha$ , tumor necrosis factor alpha; NF- $\kappa$ B, nuclear factor kappa B; COX-2, cyclooxygenase-2.

**Supplementary. Biogenic amin of gochujang (mg/kg)**

|           | HBM   | DBM    |
|-----------|-------|--------|
| Histamine | 160.7 | 199.09 |
| Tyramine  | 16.92 | 22.69  |
